# Supplementary material
Source: PubMed Central journal article supplement (PMC5709770)
Supplement: EMBR-18-2119-s001.pdf [file EMBR-18-2119-s001.pdf]

## Expanded View Figures

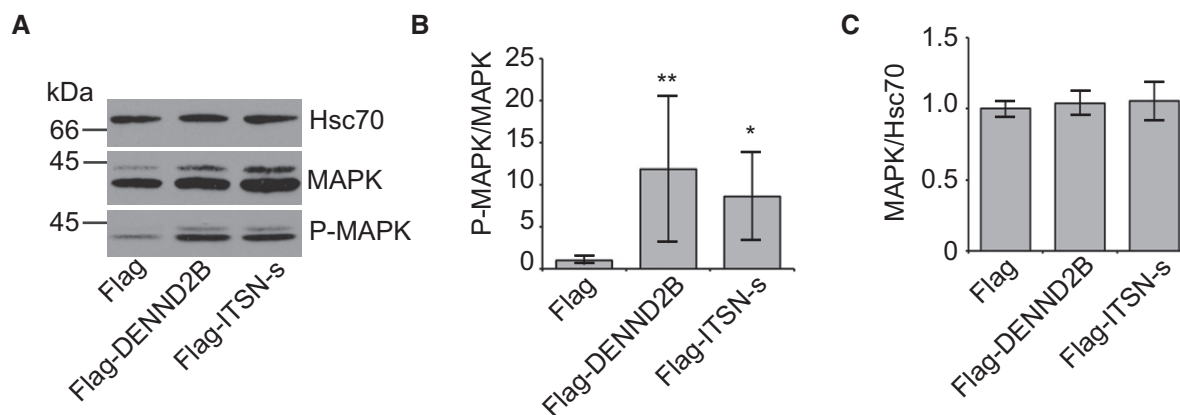

**Figure EV1. DENND2B and ITSN activate MAPK.**

A HEK-293T cells expressing Flag, Flag-DENND2B or Flag-ITSN-s were analysed by Western blot.

B Quantification of (A) where surface P-MAPK is normalized to MAPK. Mean  $\pm$  SD, ANOVA with Dunnett's *post hoc* test  $**P = 0.005$  and  $*P = 0.045$ .  $n = 7$  for all treatment groups from three independent experiments.

C Quantification of (A) where MAPK is normalized to Hsc70. Mean  $\pm$  SD,  $n = 8$  for all treatment groups from three independent experiments.

Source data are available online for this figure.
