# Supplementary material
Source: PubMed Central journal article supplement (PMC5709770)

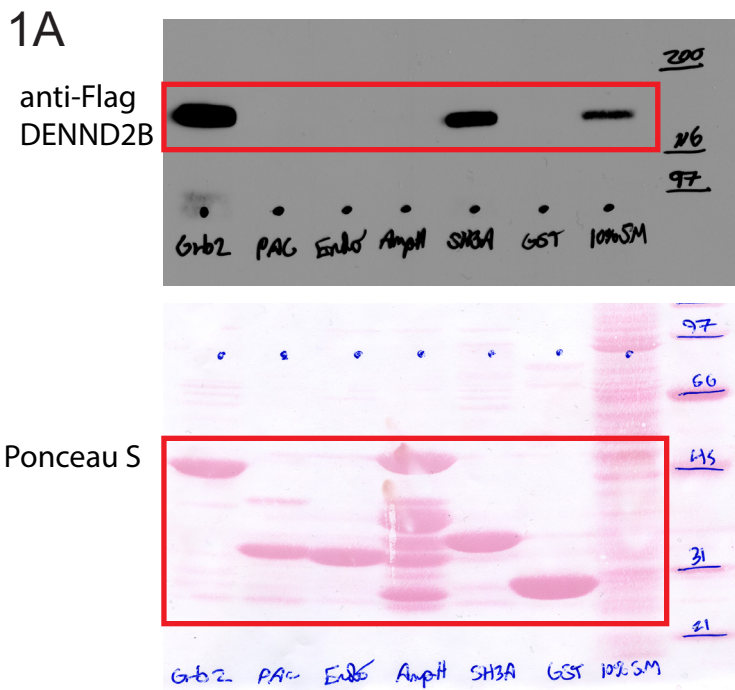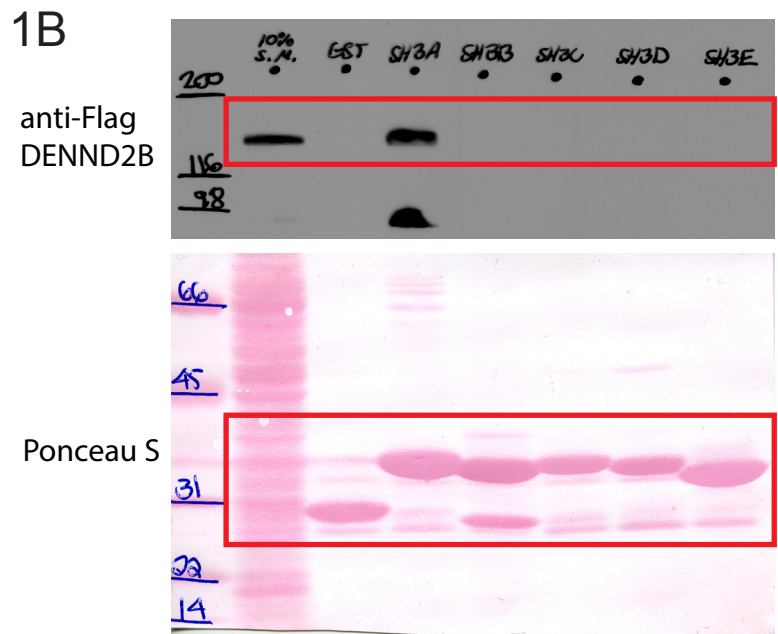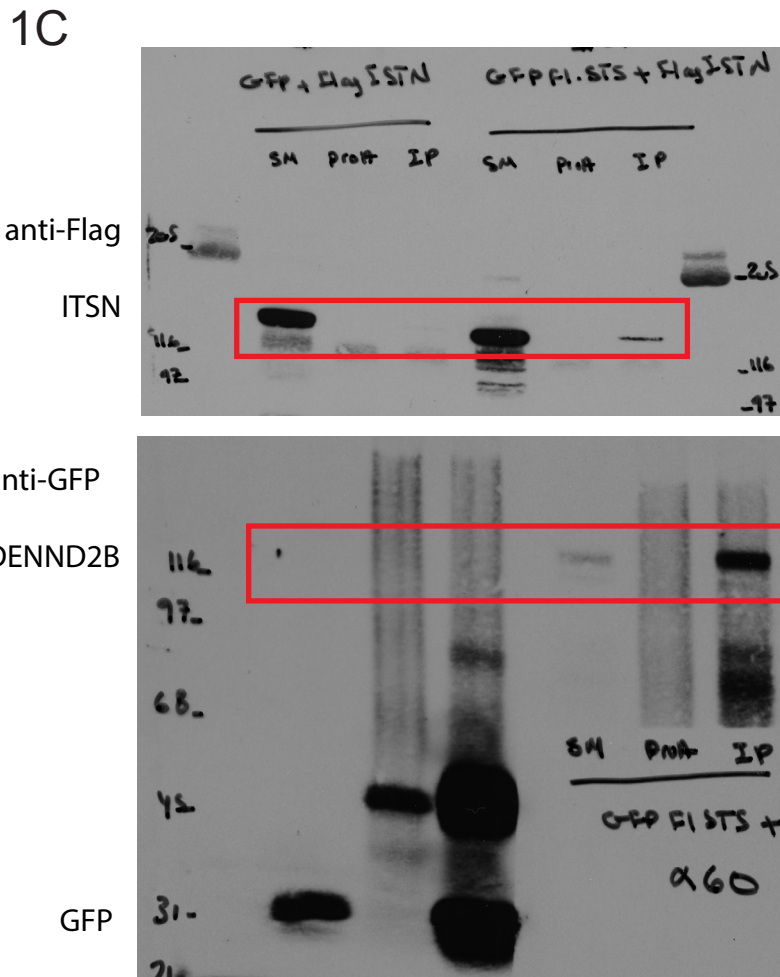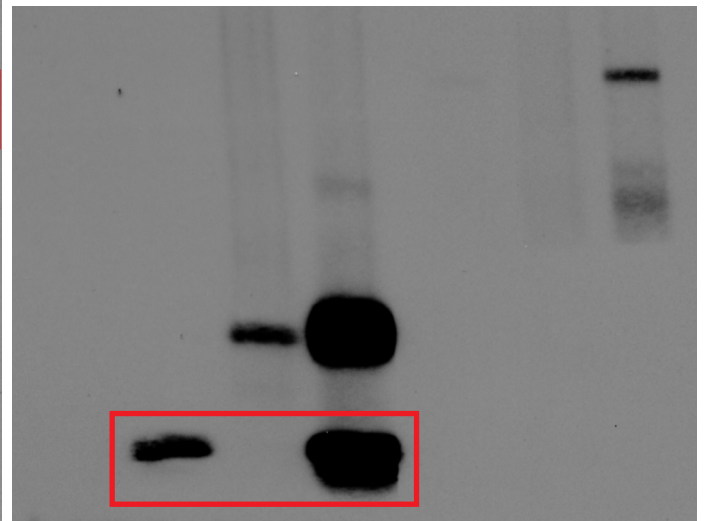

Supplement: EMBR-18-2119-s003.pdf [file EMBR-18-2119-s003.pdf]
